# Supplementary material for: The HOPE4MCI study: A randomized double‐blind assessment of AGB101 for the treatment of MCI due to AD
Source: PubMed Central journal article supplement — Alzheimers Dement (N Y). 2024 Jan 24;10(1):e12446. doi: 10.1002/trc2.12446 (PMC10865488; doi:10.1002/trc2.12446), 2024-01-24
Supplement: TRC2-10-e12446-s001.pdf [file TRC2-10-e12446-s001.pdf]

## ICMJE DISCLOSURE FORM

Date: 05/October/2023  
 Your Name: Richard C Mohs  
 Manuscript Title: The HOPE4MCI study: A randomized double-blind assessment of AGB101 for the treatment of MCI due to AD  
 Manuscript number (if known): TRCI-D-23-00082R1

In the interest of transparency, we ask you to disclose all relationships/activities/interests listed below that are related to the content of your manuscript. "Related" means any relation with for-profit or not-for-profit third parties whose interests may be affected by the content of the manuscript. Disclosure represents a commitment to transparency and does not necessarily indicate a bias. If you are in doubt about whether to list a relationship/activity/interest, it is preferable that you do so.

The following questions apply to the author's relationships/activities/interests as they relate to the current manuscript only.

The author's relationships/activities/interests should be defined broadly. For example, if your manuscript pertains to the epidemiology of hypertension, you should declare all relationships with manufacturers of antihypertensive medication, even if that medication is not mentioned in the manuscript.

In item #1 below, report all support for the work reported in this manuscript without time limit. For all other items, the time frame for disclosure is the past 36 months.

|                                                           |                                                                                                                                                                                | Name all entities with whom you have this relationship or indicate none (add rows as needed) | Specifications/Comments (e.g., if payments were made to you or to your institution)                                |
|-----------------------------------------------------------|--------------------------------------------------------------------------------------------------------------------------------------------------------------------------------|----------------------------------------------------------------------------------------------|--------------------------------------------------------------------------------------------------------------------|
| <b>Time frame: Since the initial planning of the work</b> |                                                                                                                                                                                |                                                                                              |                                                                                                                    |
| 1                                                         | All support for the present manuscript (e.g., funding, provision of study materials, medical writing, article processing charges, etc.)<br><b>No time limit for this item.</b> | National Institute on Aging                                                                  | Grant R01AG061091 "A Phase 3 Pivotal Trial of AGB101 to Slow Progression in MCI due to Alzheimer's Disease"        |
|                                                           |                                                                                                                                                                                |                                                                                              |                                                                                                                    |
|                                                           |                                                                                                                                                                                |                                                                                              |                                                                                                                    |
|                                                           |                                                                                                                                                                                |                                                                                              |                                                                                                                    |
|                                                           |                                                                                                                                                                                |                                                                                              |                                                                                                                    |
| <b>Time frame: past 36 months</b>                         |                                                                                                                                                                                |                                                                                              |                                                                                                                    |
| 2                                                         | Grants or contracts from any entity (if not indicated in item #1 above).                                                                                                       | <u>None</u>                                                                                  | PI for Grant R01AG061091 "A Phase 3 Pivotal Trial of AGB101 to Slow Progression in MCI due to Alzheimer's Disease" |
|                                                           |                                                                                                                                                                                | National Institute on Aging                                                                  |                                                                                                                    |
| 3                                                         | Royalties or licenses                                                                                                                                                          | <u>X</u> None                                                                                |                                                                                                                    |
|                                                           |                                                                                                                                                                                |                                                                                              |                                                                                                                    |
| 4                                                         | Consulting fees                                                                                                                                                                | <u>None</u>                                                                                  | Global Alzheimer's Platform (GAP) Foundation;                                                                      |
|                                                           |                                                                                                                                                                                |                                                                                              | AgeneBio, Inc.                                                                                                     |

|    |                                                                                                              |                                          |                                                                                                                    |
|----|--------------------------------------------------------------------------------------------------------------|------------------------------------------|--------------------------------------------------------------------------------------------------------------------|
|    |                                                                                                              |                                          | Amyriad Therapeutics, Inc.<br>MD Anderson Cancer Center                                                            |
| 5  | Payment or honoraria for lectures, presentations, speakers bureaus, manuscript writing or educational events | <input checked="" type="checkbox"/> None |                                                                                                                    |
| 6  | Payment for expert testimony                                                                                 | <input checked="" type="checkbox"/> None |                                                                                                                    |
| 7  | Support for attending meetings and/or travel                                                                 | <input checked="" type="checkbox"/> None |                                                                                                                    |
| 8  | Patents planned, issued or pending                                                                           | <input checked="" type="checkbox"/> None |                                                                                                                    |
| 9  | Participation on a Data Safety Monitoring Board or Advisory Board                                            | <input checked="" type="checkbox"/> None |                                                                                                                    |
| 10 | Leadership or fiduciary role in other board, society, committee or advocacy group, paid or unpaid            | <input type="checkbox"/> None            | Member, Board of Directors for Cogstate, Ltd.<br>Member, Board of Governors, Alzheimer's Drug Discovery Foundation |
| 11 | Stock or stock options                                                                                       | <input type="checkbox"/> None            | Holder of stock in Eli Lilly and Co.                                                                               |
| 12 | Receipt of equipment, materials, drugs, medical writing, gifts or other services                             | <input checked="" type="checkbox"/> None |                                                                                                                    |
| 13 | Other financial or non-financial interests                                                                   | <input checked="" type="checkbox"/> None |                                                                                                                    |

Please place an "X" next to the following statement to indicate your agreement:

I certify that I have answered every question and have not altered the wording of any of the questions on this form.

## ICMJE DISCLOSURE FORM

**Date:** 10/10/2023

**Your Name:** Arnold Bakker

**Manuscript Title:** The HOPE4MCI study: A randomized double-blind assessment of AGB101 for the treatment of MCI due to AD

**Manuscript Number (if known):** TRCI-D-23-00082R1

In the interest of transparency, we ask you to disclose all relationships/activities/interests listed below that are related to the content of your manuscript. "Related" means any relation with for-profit or not-for-profit third parties whose interests may be affected by the content of the manuscript. Disclosure represents a commitment to transparency and does not necessarily indicate a bias. If you are in doubt about whether to list a relationship/activity/interest, it is preferable that you do so.

The author's relationships/activities/interests should be defined broadly. For example, if your manuscript pertains to the epidemiology of hypertension, you should declare all relationships with manufacturers of antihypertensive medication, even if that medication is not mentioned in the manuscript.

In item #1 below, report all support for the work reported in this manuscript without time limit. For all other items, the time frame for disclosure is the past 36 months.

|                                                    | Name all entities with whom you have this relationship or indicate none (add rows as needed)                                                                                   | Specifications/Comments (e.g., if payments were made to you or to your institution)                                                                                                                                                                                                                                                                                                              |             |                                       |  |  |                                           |  |
|----------------------------------------------------|--------------------------------------------------------------------------------------------------------------------------------------------------------------------------------|--------------------------------------------------------------------------------------------------------------------------------------------------------------------------------------------------------------------------------------------------------------------------------------------------------------------------------------------------------------------------------------------------|-------------|---------------------------------------|--|--|-------------------------------------------|--|
| Time frame: Since the initial planning of the work |                                                                                                                                                                                |                                                                                                                                                                                                                                                                                                                                                                                                  |             |                                       |  |  |                                           |  |
| <b>1</b>                                           | All support for the present manuscript (e.g., funding, provision of study materials, medical writing, article processing charges, etc.)<br><b>No time limit for this item.</b> | <input type="checkbox"/> <b>None</b><br><table border="1" style="width: 100%; border-collapse: collapse; margin-top: 5px;"> <tr> <td style="width: 60%;">R01AG061091</td> <td>NIH Grant to Johns Hopkins University</td> </tr> <tr> <td> </td> <td> </td> </tr> <tr> <td colspan="2" style="text-align: center; font-size: small;">Click the tab key to add additional rows.</td> </tr> </table> | R01AG061091 | NIH Grant to Johns Hopkins University |  |  | Click the tab key to add additional rows. |  |
| R01AG061091                                        | NIH Grant to Johns Hopkins University                                                                                                                                          |                                                                                                                                                                                                                                                                                                                                                                                                  |             |                                       |  |  |                                           |  |
|                                                    |                                                                                                                                                                                |                                                                                                                                                                                                                                                                                                                                                                                                  |             |                                       |  |  |                                           |  |
| Click the tab key to add additional rows.          |                                                                                                                                                                                |                                                                                                                                                                                                                                                                                                                                                                                                  |             |                                       |  |  |                                           |  |
| Time frame: past 36 months                         |                                                                                                                                                                                |                                                                                                                                                                                                                                                                                                                                                                                                  |             |                                       |  |  |                                           |  |
| <b>2</b>                                           | Grants or contracts from any entity (if not indicated in item #1 above).                                                                                                       | <input checked="" type="checkbox"/> <b>None</b><br><table border="1" style="width: 100%; border-collapse: collapse; margin-top: 5px;"> <tr><td> </td><td> </td></tr> <tr><td> </td><td> </td></tr> <tr><td> </td><td> </td></tr> </table>                                                                                                                                                        |             |                                       |  |  |                                           |  |
|                                                    |                                                                                                                                                                                |                                                                                                                                                                                                                                                                                                                                                                                                  |             |                                       |  |  |                                           |  |
|                                                    |                                                                                                                                                                                |                                                                                                                                                                                                                                                                                                                                                                                                  |             |                                       |  |  |                                           |  |
|                                                    |                                                                                                                                                                                |                                                                                                                                                                                                                                                                                                                                                                                                  |             |                                       |  |  |                                           |  |
| <b>3</b>                                           | Royalties or licenses                                                                                                                                                          | <input checked="" type="checkbox"/> <b>None</b><br><table border="1" style="width: 100%; border-collapse: collapse; margin-top: 5px;"> <tr><td> </td><td> </td></tr> <tr><td> </td><td> </td></tr> <tr><td> </td><td> </td></tr> </table>                                                                                                                                                        |             |                                       |  |  |                                           |  |
|                                                    |                                                                                                                                                                                |                                                                                                                                                                                                                                                                                                                                                                                                  |             |                                       |  |  |                                           |  |
|                                                    |                                                                                                                                                                                |                                                                                                                                                                                                                                                                                                                                                                                                  |             |                                       |  |  |                                           |  |
|                                                    |                                                                                                                                                                                |                                                                                                                                                                                                                                                                                                                                                                                                  |             |                                       |  |  |                                           |  |

|    |                                                                                                              | Name all entities with whom you have this relationship or indicate none (add rows as needed)                                                                                         | Specifications/Comments (e.g., if payments were made to you or to your institution) |
|----|--------------------------------------------------------------------------------------------------------------|--------------------------------------------------------------------------------------------------------------------------------------------------------------------------------------|-------------------------------------------------------------------------------------|
| 4  | Consulting fees                                                                                              | <input type="checkbox"/> None                                                                                                                                                        |                                                                                     |
|    |                                                                                                              | AgeneBio, Inc.                                                                                                                                                                       | Consultant                                                                          |
|    |                                                                                                              |                                                                                                                                                                                      |                                                                                     |
|    |                                                                                                              |                                                                                                                                                                                      |                                                                                     |
| 5  | Payment or honoraria for lectures, presentations, speakers bureaus, manuscript writing or educational events | <input type="checkbox"/> None                                                                                                                                                        |                                                                                     |
|    |                                                                                                              | Science Luncheon Series. UTD Center for Vital Longevity. Dallas, TX                                                                                                                  | Honorarium for invited lecture.                                                     |
|    |                                                                                                              |                                                                                                                                                                                      |                                                                                     |
|    |                                                                                                              |                                                                                                                                                                                      |                                                                                     |
| 6  | Payment for expert testimony                                                                                 | <input checked="" type="checkbox"/> None                                                                                                                                             |                                                                                     |
|    |                                                                                                              |                                                                                                                                                                                      |                                                                                     |
|    |                                                                                                              |                                                                                                                                                                                      |                                                                                     |
|    |                                                                                                              |                                                                                                                                                                                      |                                                                                     |
| 7  | Support for attending meetings and/or travel                                                                 | <input checked="" type="checkbox"/> None                                                                                                                                             |                                                                                     |
|    |                                                                                                              |                                                                                                                                                                                      |                                                                                     |
|    |                                                                                                              |                                                                                                                                                                                      |                                                                                     |
|    |                                                                                                              |                                                                                                                                                                                      |                                                                                     |
| 8  | Patents planned, issued or pending                                                                           | <input type="checkbox"/> None                                                                                                                                                        |                                                                                     |
|    |                                                                                                              | US-2021244709-A1<br>Methods and compositions for improving cognitive function                                                                                                        | Listed inventor                                                                     |
|    |                                                                                                              |                                                                                                                                                                                      |                                                                                     |
|    |                                                                                                              |                                                                                                                                                                                      |                                                                                     |
| 9  | Participation on a Data Safety Monitoring Board or Advisory Board                                            | <input type="checkbox"/> None                                                                                                                                                        |                                                                                     |
|    |                                                                                                              | DSMB Member, NIH supported clinical trial: Network-Level Mechanisms for Preclinical Alzheimer's Disease Development (1R21AG056882). Medical College of Wisconsin, Milwaukee WI, USA. | Not compensated.                                                                    |
|    |                                                                                                              |                                                                                                                                                                                      |                                                                                     |
|    |                                                                                                              |                                                                                                                                                                                      |                                                                                     |
| 10 | Leadership or fiduciary role in other board, society, committee or                                           | <input checked="" type="checkbox"/> None                                                                                                                                             |                                                                                     |
|    |                                                                                                              |                                                                                                                                                                                      |                                                                                     |
|    |                                                                                                              |                                                                                                                                                                                      |                                                                                     |
|    |                                                                                                              |                                                                                                                                                                                      |                                                                                     |

|           |                                                                                  | Name all entities with whom you have this relationship or indicate none (add rows as needed) | Specifications/Comments (e.g., if payments were made to you or to your institution) |
|-----------|----------------------------------------------------------------------------------|----------------------------------------------------------------------------------------------|-------------------------------------------------------------------------------------|
|           | advocacy group, paid or unpaid                                                   |                                                                                              |                                                                                     |
| <b>11</b> | Stock or stock options                                                           | <input checked="" type="checkbox"/> <b>None</b>                                              |                                                                                     |
|           |                                                                                  |                                                                                              |                                                                                     |
|           |                                                                                  |                                                                                              |                                                                                     |
| <b>12</b> | Receipt of equipment, materials, drugs, medical writing, gifts or other services | <input checked="" type="checkbox"/> <b>None</b>                                              |                                                                                     |
|           |                                                                                  |                                                                                              |                                                                                     |
|           |                                                                                  |                                                                                              |                                                                                     |
| <b>13</b> | Other financial or non-financial interests                                       | <input checked="" type="checkbox"/> <b>None</b>                                              |                                                                                     |
|           |                                                                                  |                                                                                              |                                                                                     |
|           |                                                                                  |                                                                                              |                                                                                     |

Please place an "X" next to the following statement to indicate your agreement:

I certify that I have answered every question and have not altered the wording of any of the questions on this form.

## ICMJE DISCLOSURE FORM

**Date:** 10/7/2023

**Your Name:** Sharon Rosenzweig-Lipson

**Manuscript Title:** The HOPE4MCI study: A randomized double-blind assessment of AGB101 for the treatment of MCI due to AD

**Manuscript Number (if known):** TRCI-D-23-00082R1

In the interest of transparency, we ask you to disclose all relationships/activities/interests listed below that are related to the content of your manuscript. "Related" means any relation with for-profit or not-for-profit third parties whose interests may be affected by the content of the manuscript. Disclosure represents a commitment to transparency and does not necessarily indicate a bias. If you are in doubt about whether to list a relationship/activity/interest, it is preferable that you do so.

The author's relationships/activities/interests should be defined broadly. For example, if your manuscript pertains to the epidemiology of hypertension, you should declare all relationships with manufacturers of antihypertensive medication, even if that medication is not mentioned in the manuscript.

In item #1 below, report all support for the work reported in this manuscript without time limit. For all other items, the time frame for disclosure is the past 36 months.

|                                                    |                                                                                                                                                                                | Name all entities with whom you have this relationship or indicate none (add rows as needed) |                                       |                     |
|----------------------------------------------------|--------------------------------------------------------------------------------------------------------------------------------------------------------------------------------|----------------------------------------------------------------------------------------------|---------------------------------------|---------------------|
| Time frame: Since the initial planning of the work |                                                                                                                                                                                |                                                                                              |                                       |                     |
| <b>1</b>                                           | All support for the present manuscript (e.g., funding, provision of study materials, medical writing, article processing charges, etc.)<br><b>No time limit for this item.</b> | <input type="checkbox"/> <b>None</b>                                                         |                                       |                     |
|                                                    |                                                                                                                                                                                | AgeneBio                                                                                     | VP of R&D for AgeneBio (2011-present) | employee/consultant |
|                                                    |                                                                                                                                                                                | NIH U01AG074950; R01AG078769                                                                 | RO1                                   |                     |
|                                                    |                                                                                                                                                                                | ADDF                                                                                         |                                       |                     |
| Time frame: past 36 months                         |                                                                                                                                                                                |                                                                                              |                                       |                     |
| <b>2</b>                                           | Grants or contracts from any entity (if not indicated in item #1 above).                                                                                                       | <input checked="" type="checkbox"/> <b>None</b>                                              |                                       |                     |
|                                                    |                                                                                                                                                                                |                                                                                              |                                       |                     |
|                                                    |                                                                                                                                                                                |                                                                                              |                                       |                     |
| <b>3</b>                                           | Royalties or licenses                                                                                                                                                          | <input checked="" type="checkbox"/> <b>None</b>                                              |                                       |                     |
|                                                    |                                                                                                                                                                                |                                                                                              |                                       |                     |
|                                                    |                                                                                                                                                                                |                                                                                              |                                       |                     |

|    |                                                                                                              | Name all entities with whom you have this relationship or indicate none (add rows as needed) |                                                                   |
|----|--------------------------------------------------------------------------------------------------------------|----------------------------------------------------------------------------------------------|-------------------------------------------------------------------|
| 4  | Consulting fees                                                                                              | <input checked="" type="checkbox"/> None                                                     |                                                                   |
|    |                                                                                                              | AgeneBio                                                                                     | VP of R&D for AgeneBio (2011-present)<br>employee/consultant      |
|    |                                                                                                              | Life Biosciences                                                                             | CSO for Life Biosciences (2023-present)<br>Consultant (2022-2023) |
|    |                                                                                                              |                                                                                              |                                                                   |
| 5  | Payment or honoraria for lectures, presentations, speakers bureaus, manuscript writing or educational events | <input checked="" type="checkbox"/> None                                                     |                                                                   |
|    |                                                                                                              |                                                                                              |                                                                   |
|    |                                                                                                              |                                                                                              |                                                                   |
| 6  | Payment for expert testimony                                                                                 | <input checked="" type="checkbox"/> None                                                     |                                                                   |
|    |                                                                                                              |                                                                                              |                                                                   |
|    |                                                                                                              |                                                                                              |                                                                   |
| 7  | Support for attending meetings and/or travel                                                                 | <input type="checkbox"/> None                                                                |                                                                   |
|    |                                                                                                              | AgeneBio                                                                                     | CTAD, AAIC                                                        |
|    |                                                                                                              |                                                                                              |                                                                   |
| 8  | Patents planned, issued or pending                                                                           | <input type="checkbox"/> None                                                                |                                                                   |
|    |                                                                                                              | BR-112017025031-B1<br>EP-3590506-A1<br>OA-18467-A<br>CA-3189302-A1                           | Listed co-inventor                                                |
|    |                                                                                                              |                                                                                              |                                                                   |
| 9  | Participation on a Data Safety Monitoring Board or Advisory Board                                            | <input checked="" type="checkbox"/> None                                                     |                                                                   |
|    |                                                                                                              |                                                                                              |                                                                   |
|    |                                                                                                              |                                                                                              |                                                                   |
| 10 | Leadership or fiduciary role in other board, society, committee or advocacy group, paid or unpaid            | <input checked="" type="checkbox"/> None                                                     |                                                                   |
|    |                                                                                                              |                                                                                              |                                                                   |
|    |                                                                                                              |                                                                                              |                                                                   |

|    |                                                                                  | Name all entities with whom you have this relationship or indicate none (add rows as needed) |               |
|----|----------------------------------------------------------------------------------|----------------------------------------------------------------------------------------------|---------------|
| 11 | Stock or stock options                                                           | <input type="checkbox"/> None                                                                |               |
|    |                                                                                  | AgeneBio                                                                                     | Stock options |
|    |                                                                                  |                                                                                              |               |
|    |                                                                                  |                                                                                              |               |
| 12 | Receipt of equipment, materials, drugs, medical writing, gifts or other services | <input type="checkbox"/> None                                                                |               |
|    |                                                                                  | AgeneBio                                                                                     | Computer      |
|    |                                                                                  |                                                                                              |               |
|    |                                                                                  |                                                                                              |               |
| 13 | Other financial or non-financial interests                                       | <input checked="" type="checkbox"/> None                                                     |               |
|    |                                                                                  |                                                                                              |               |
|    |                                                                                  |                                                                                              |               |
|    |                                                                                  |                                                                                              |               |

**Please place an "X" next to the following statement to indicate your agreement:**

I certify that I have answered every question and have not altered the wording of any of the questions on this form.



## ICMJE DISCLOSURE FORM

**Date:** 10/10/2023

**Your Name:** Michael Rosenblum

**Manuscript Title:** The HOPE4MCI study: A randomized double-blind assessment of AGB101 for the treatment of MCI due to AD

**Manuscript Number (if known):** TRCI-D-23-00082R1

In the interest of transparency, we ask you to disclose all relationships/activities/interests listed below that are related to the content of your manuscript. "Related" means any relation with for-profit or not-for-profit third parties whose interests may be affected by the content of the manuscript. Disclosure represents a commitment to transparency and does not necessarily indicate a bias. If you are in doubt about whether to list a relationship/activity/interest, it is preferable that you do so.

The author's relationships/activities/interests should be defined broadly. For example, if your manuscript pertains to the epidemiology of hypertension, you should declare all relationships with manufacturers of antihypertensive medication, even if that medication is not mentioned in the manuscript.

In item #1 below, report all support for the work reported in this manuscript without time limit. For all other items, the time frame for disclosure is the past 36 months.

|                                                                            | Name all entities with whom you have this relationship or indicate none (add rows as needed)                                                                                   | Specifications/Comments (e.g., if payments were made to you or to your institution)                                                                                                                                                                                                                                                                                                                                                                                                                                             |                            |  |                                                                            |  |                                                                     |  |                                           |  |
|----------------------------------------------------------------------------|--------------------------------------------------------------------------------------------------------------------------------------------------------------------------------|---------------------------------------------------------------------------------------------------------------------------------------------------------------------------------------------------------------------------------------------------------------------------------------------------------------------------------------------------------------------------------------------------------------------------------------------------------------------------------------------------------------------------------|----------------------------|--|----------------------------------------------------------------------------|--|---------------------------------------------------------------------|--|-------------------------------------------|--|
| Time frame: Since the initial planning of the work                         |                                                                                                                                                                                |                                                                                                                                                                                                                                                                                                                                                                                                                                                                                                                                 |                            |  |                                                                            |  |                                                                     |  |                                           |  |
| <b>1</b>                                                                   | All support for the present manuscript (e.g., funding, provision of study materials, medical writing, article processing charges, etc.)<br><b>No time limit for this item.</b> | <input type="checkbox"/> None<br><br><table border="1" style="width: 100%; border-collapse: collapse;"> <tr> <td style="width: 60%;">NIH/NIDA Grant R01AG048349</td> <td></td> </tr> <tr> <td>Consulting for Agenebio by consulting company Evolution Trial Design, Inc.</td> <td></td> </tr> <tr> <td>Dr. Rosenblum is president and co-owner of this consulting company.</td> <td></td> </tr> <tr> <td colspan="2" style="text-align: right; font-size: small;">Click the tab key to add additional rows.</td> </tr> </table> | NIH/NIDA Grant R01AG048349 |  | Consulting for Agenebio by consulting company Evolution Trial Design, Inc. |  | Dr. Rosenblum is president and co-owner of this consulting company. |  | Click the tab key to add additional rows. |  |
| NIH/NIDA Grant R01AG048349                                                 |                                                                                                                                                                                |                                                                                                                                                                                                                                                                                                                                                                                                                                                                                                                                 |                            |  |                                                                            |  |                                                                     |  |                                           |  |
| Consulting for Agenebio by consulting company Evolution Trial Design, Inc. |                                                                                                                                                                                |                                                                                                                                                                                                                                                                                                                                                                                                                                                                                                                                 |                            |  |                                                                            |  |                                                                     |  |                                           |  |
| Dr. Rosenblum is president and co-owner of this consulting company.        |                                                                                                                                                                                |                                                                                                                                                                                                                                                                                                                                                                                                                                                                                                                                 |                            |  |                                                                            |  |                                                                     |  |                                           |  |
| Click the tab key to add additional rows.                                  |                                                                                                                                                                                |                                                                                                                                                                                                                                                                                                                                                                                                                                                                                                                                 |                            |  |                                                                            |  |                                                                     |  |                                           |  |
| Time frame: past 36 months                                                 |                                                                                                                                                                                |                                                                                                                                                                                                                                                                                                                                                                                                                                                                                                                                 |                            |  |                                                                            |  |                                                                     |  |                                           |  |
| <b>2</b>                                                                   | Grants or contracts from any entity (if not indicated in item #1 above).                                                                                                       | <input checked="" type="checkbox"/> None<br><br><table border="1" style="width: 100%; border-collapse: collapse;"> <tr><td style="width: 60%; height: 20px;"></td><td></td></tr> <tr><td style="height: 20px;"></td><td></td></tr> <tr><td style="height: 20px;"></td><td></td></tr> </table>                                                                                                                                                                                                                                   |                            |  |                                                                            |  |                                                                     |  |                                           |  |
|                                                                            |                                                                                                                                                                                |                                                                                                                                                                                                                                                                                                                                                                                                                                                                                                                                 |                            |  |                                                                            |  |                                                                     |  |                                           |  |
|                                                                            |                                                                                                                                                                                |                                                                                                                                                                                                                                                                                                                                                                                                                                                                                                                                 |                            |  |                                                                            |  |                                                                     |  |                                           |  |
|                                                                            |                                                                                                                                                                                |                                                                                                                                                                                                                                                                                                                                                                                                                                                                                                                                 |                            |  |                                                                            |  |                                                                     |  |                                           |  |
| <b>3</b>                                                                   | Royalties or licenses                                                                                                                                                          | <input checked="" type="checkbox"/> None<br><br><table border="1" style="width: 100%; border-collapse: collapse;"> <tr><td style="width: 60%; height: 20px;"></td><td></td></tr> <tr><td style="height: 20px;"></td><td></td></tr> <tr><td style="height: 20px;"></td><td></td></tr> </table>                                                                                                                                                                                                                                   |                            |  |                                                                            |  |                                                                     |  |                                           |  |
|                                                                            |                                                                                                                                                                                |                                                                                                                                                                                                                                                                                                                                                                                                                                                                                                                                 |                            |  |                                                                            |  |                                                                     |  |                                           |  |
|                                                                            |                                                                                                                                                                                |                                                                                                                                                                                                                                                                                                                                                                                                                                                                                                                                 |                            |  |                                                                            |  |                                                                     |  |                                           |  |
|                                                                            |                                                                                                                                                                                |                                                                                                                                                                                                                                                                                                                                                                                                                                                                                                                                 |                            |  |                                                                            |  |                                                                     |  |                                           |  |

|    |                                                                                                              | Name all entities with whom you have this relationship or indicate none (add rows as needed)                                         | Specifications/Comments (e.g., if payments were made to you or to your institution) |
|----|--------------------------------------------------------------------------------------------------------------|--------------------------------------------------------------------------------------------------------------------------------------|-------------------------------------------------------------------------------------|
| 4  | Consulting fees                                                                                              | <input type="checkbox"/> None                                                                                                        |                                                                                     |
|    |                                                                                                              | Consulting for Agenebio with consulting company Evolution Trial Design, Inc. (Dr. Rosenblum is president of this consulting company) |                                                                                     |
|    |                                                                                                              |                                                                                                                                      |                                                                                     |
|    |                                                                                                              |                                                                                                                                      |                                                                                     |
| 5  | Payment or honoraria for lectures, presentations, speakers bureaus, manuscript writing or educational events | <input checked="" type="checkbox"/> None                                                                                             |                                                                                     |
|    |                                                                                                              |                                                                                                                                      |                                                                                     |
|    |                                                                                                              |                                                                                                                                      |                                                                                     |
|    |                                                                                                              |                                                                                                                                      |                                                                                     |
| 6  | Payment for expert testimony                                                                                 | <input checked="" type="checkbox"/> None                                                                                             |                                                                                     |
|    |                                                                                                              |                                                                                                                                      |                                                                                     |
|    |                                                                                                              |                                                                                                                                      |                                                                                     |
|    |                                                                                                              |                                                                                                                                      |                                                                                     |
| 7  | Support for attending meetings and/or travel                                                                 | <input checked="" type="checkbox"/> None                                                                                             |                                                                                     |
|    |                                                                                                              | Aforementioned NIH grant reimbursed travel costs for oral presentation at CTAD conference.                                           |                                                                                     |
|    |                                                                                                              |                                                                                                                                      |                                                                                     |
|    |                                                                                                              |                                                                                                                                      |                                                                                     |
| 8  | Patents planned, issued or pending                                                                           | <input checked="" type="checkbox"/> None                                                                                             |                                                                                     |
|    |                                                                                                              |                                                                                                                                      |                                                                                     |
|    |                                                                                                              |                                                                                                                                      |                                                                                     |
|    |                                                                                                              |                                                                                                                                      |                                                                                     |
| 9  | Participation on a Data Safety Monitoring Board or Advisory Board                                            | <input checked="" type="checkbox"/> None                                                                                             |                                                                                     |
|    |                                                                                                              |                                                                                                                                      |                                                                                     |
|    |                                                                                                              |                                                                                                                                      |                                                                                     |
|    |                                                                                                              |                                                                                                                                      |                                                                                     |
| 10 | Leadership or fiduciary role in other board, society, committee or advocacy group, paid or unpaid            | <input type="checkbox"/> None                                                                                                        |                                                                                     |
|    |                                                                                                              | Consulting for Agenebio with consulting company Evolution Trial Design, Inc. (Dr. Rosenblum is president of this consulting company) |                                                                                     |
|    |                                                                                                              |                                                                                                                                      |                                                                                     |
|    |                                                                                                              |                                                                                                                                      |                                                                                     |

|    |                                                                                  | Name all entities with whom you have this relationship or indicate none (add rows as needed) | Specifications/Comments (e.g., if payments were made to you or to your institution) |
|----|----------------------------------------------------------------------------------|----------------------------------------------------------------------------------------------|-------------------------------------------------------------------------------------|
| 11 | Stock or stock options                                                           | <input checked="" type="checkbox"/> None                                                     |                                                                                     |
|    |                                                                                  |                                                                                              |                                                                                     |
|    |                                                                                  |                                                                                              |                                                                                     |
|    |                                                                                  |                                                                                              |                                                                                     |
| 12 | Receipt of equipment, materials, drugs, medical writing, gifts or other services | <input checked="" type="checkbox"/> None                                                     |                                                                                     |
|    |                                                                                  |                                                                                              |                                                                                     |
|    |                                                                                  |                                                                                              |                                                                                     |
|    |                                                                                  |                                                                                              |                                                                                     |
| 13 | Other financial or non-financial interests                                       | <input checked="" type="checkbox"/> None                                                     |                                                                                     |
|    |                                                                                  |                                                                                              |                                                                                     |
|    |                                                                                  |                                                                                              |                                                                                     |
|    |                                                                                  |                                                                                              |                                                                                     |

Please place an "X" next to the following statement to indicate your agreement:

I certify that I have answered every question and have not altered the wording of any of the questions on this form.

## ICMJE DISCLOSURE FORM

**Date:** 10/10/2023

**Your Name:** Russell L. Barton

**Manuscript Title:** The HOPE4MCI study: A randomized double-blind assessment of AGB101 for the treatment of MCI due to AD

**Manuscript Number (if known):** TRCI-D-23-00082R1

In the interest of transparency, we ask you to disclose all relationships/activities/interests listed below that are related to the content of your manuscript. "Related" means any relation with for-profit or not-for-profit third parties whose interests may be affected by the content of the manuscript. Disclosure represents a commitment to transparency and does not necessarily indicate a bias. If you are in doubt about whether to list a relationship/activity/interest, it is preferable that you do so.

The author's relationships/activities/interests should be defined broadly. For example, if your manuscript pertains to the epidemiology of hypertension, you should declare all relationships with manufacturers of antihypertensive medication, even if that medication is not mentioned in the manuscript.

In item #1 below, report all support for the work reported in this manuscript without time limit. For all other items, the time frame for disclosure is the past 36 months.

|                                                                                    | Name all entities with whom you have this relationship or indicate none (add rows as needed)                                                                                   | Specifications/Comments (e.g., if payments were made to you or to your institution)                                                                                                                                                                                                                                                                                                                                                                                                                                                                                  |                            |  |                                                                              |  |                                                                                    |  |                                           |  |
|------------------------------------------------------------------------------------|--------------------------------------------------------------------------------------------------------------------------------------------------------------------------------|----------------------------------------------------------------------------------------------------------------------------------------------------------------------------------------------------------------------------------------------------------------------------------------------------------------------------------------------------------------------------------------------------------------------------------------------------------------------------------------------------------------------------------------------------------------------|----------------------------|--|------------------------------------------------------------------------------|--|------------------------------------------------------------------------------------|--|-------------------------------------------|--|
| Time frame: Since the initial planning of the work                                 |                                                                                                                                                                                |                                                                                                                                                                                                                                                                                                                                                                                                                                                                                                                                                                      |                            |  |                                                                              |  |                                                                                    |  |                                           |  |
| <b>1</b>                                                                           | All support for the present manuscript (e.g., funding, provision of study materials, medical writing, article processing charges, etc.)<br><b>No time limit for this item.</b> | <input type="checkbox"/> <b>None</b><br><table border="1" style="width: 100%; border-collapse: collapse; margin-top: 5px;"> <tr> <td style="width: 60%;">NIH/NIDA Grant R01AG048349</td> <td></td> </tr> <tr> <td>Consulting for AgeneBio by consulting company PharmaSagacity Consulting, LLC</td> <td></td> </tr> <tr> <td>Russell Barton is president and independent consultant of this consulting company.</td> <td></td> </tr> <tr> <td colspan="2" style="text-align: right; font-size: small;">Click the tab key to add additional rows.</td> </tr> </table> | NIH/NIDA Grant R01AG048349 |  | Consulting for AgeneBio by consulting company PharmaSagacity Consulting, LLC |  | Russell Barton is president and independent consultant of this consulting company. |  | Click the tab key to add additional rows. |  |
| NIH/NIDA Grant R01AG048349                                                         |                                                                                                                                                                                |                                                                                                                                                                                                                                                                                                                                                                                                                                                                                                                                                                      |                            |  |                                                                              |  |                                                                                    |  |                                           |  |
| Consulting for AgeneBio by consulting company PharmaSagacity Consulting, LLC       |                                                                                                                                                                                |                                                                                                                                                                                                                                                                                                                                                                                                                                                                                                                                                                      |                            |  |                                                                              |  |                                                                                    |  |                                           |  |
| Russell Barton is president and independent consultant of this consulting company. |                                                                                                                                                                                |                                                                                                                                                                                                                                                                                                                                                                                                                                                                                                                                                                      |                            |  |                                                                              |  |                                                                                    |  |                                           |  |
| Click the tab key to add additional rows.                                          |                                                                                                                                                                                |                                                                                                                                                                                                                                                                                                                                                                                                                                                                                                                                                                      |                            |  |                                                                              |  |                                                                                    |  |                                           |  |
| Time frame: past 36 months                                                         |                                                                                                                                                                                |                                                                                                                                                                                                                                                                                                                                                                                                                                                                                                                                                                      |                            |  |                                                                              |  |                                                                                    |  |                                           |  |
| <b>2</b>                                                                           | Grants or contracts from any entity (if not indicated in item #1 above).                                                                                                       | <input checked="" type="checkbox"/> <b>None</b><br><table border="1" style="width: 100%; border-collapse: collapse; margin-top: 5px;"> <tr><td style="width: 60%; height: 20px;"></td><td></td></tr> <tr><td style="height: 20px;"></td><td></td></tr> <tr><td style="height: 20px;"></td><td></td></tr> </table>                                                                                                                                                                                                                                                    |                            |  |                                                                              |  |                                                                                    |  |                                           |  |
|                                                                                    |                                                                                                                                                                                |                                                                                                                                                                                                                                                                                                                                                                                                                                                                                                                                                                      |                            |  |                                                                              |  |                                                                                    |  |                                           |  |
|                                                                                    |                                                                                                                                                                                |                                                                                                                                                                                                                                                                                                                                                                                                                                                                                                                                                                      |                            |  |                                                                              |  |                                                                                    |  |                                           |  |
|                                                                                    |                                                                                                                                                                                |                                                                                                                                                                                                                                                                                                                                                                                                                                                                                                                                                                      |                            |  |                                                                              |  |                                                                                    |  |                                           |  |
| <b>3</b>                                                                           | Royalties or licenses                                                                                                                                                          | <input checked="" type="checkbox"/> <b>None</b><br><table border="1" style="width: 100%; border-collapse: collapse; margin-top: 5px;"> <tr><td style="width: 60%; height: 20px;"></td><td></td></tr> <tr><td style="height: 20px;"></td><td></td></tr> <tr><td style="height: 20px;"></td><td></td></tr> </table>                                                                                                                                                                                                                                                    |                            |  |                                                                              |  |                                                                                    |  |                                           |  |
|                                                                                    |                                                                                                                                                                                |                                                                                                                                                                                                                                                                                                                                                                                                                                                                                                                                                                      |                            |  |                                                                              |  |                                                                                    |  |                                           |  |
|                                                                                    |                                                                                                                                                                                |                                                                                                                                                                                                                                                                                                                                                                                                                                                                                                                                                                      |                            |  |                                                                              |  |                                                                                    |  |                                           |  |
|                                                                                    |                                                                                                                                                                                |                                                                                                                                                                                                                                                                                                                                                                                                                                                                                                                                                                      |                            |  |                                                                              |  |                                                                                    |  |                                           |  |

|    |                                                                                                              | Name all entities with whom you have this relationship or indicate none (add rows as needed)                                                                       | Specifications/Comments (e.g., if payments were made to you or to your institution) |
|----|--------------------------------------------------------------------------------------------------------------|--------------------------------------------------------------------------------------------------------------------------------------------------------------------|-------------------------------------------------------------------------------------|
| 4  | Consulting fees                                                                                              | <input type="checkbox"/> None                                                                                                                                      |                                                                                     |
|    |                                                                                                              | Consulting for AgeneBio by consulting company PharmaSagacity Consulting, LLC<br>Russell Barton is president and independent consultant of this consulting company. |                                                                                     |
|    |                                                                                                              |                                                                                                                                                                    |                                                                                     |
|    |                                                                                                              |                                                                                                                                                                    |                                                                                     |
| 5  | Payment or honoraria for lectures, presentations, speakers bureaus, manuscript writing or educational events | <input checked="" type="checkbox"/> None                                                                                                                           |                                                                                     |
|    |                                                                                                              |                                                                                                                                                                    |                                                                                     |
|    |                                                                                                              |                                                                                                                                                                    |                                                                                     |
|    |                                                                                                              |                                                                                                                                                                    |                                                                                     |
| 6  | Payment for expert testimony                                                                                 | <input checked="" type="checkbox"/> None                                                                                                                           |                                                                                     |
|    |                                                                                                              |                                                                                                                                                                    |                                                                                     |
|    |                                                                                                              |                                                                                                                                                                    |                                                                                     |
|    |                                                                                                              |                                                                                                                                                                    |                                                                                     |
| 7  | Support for attending meetings and/or travel                                                                 | <input type="checkbox"/> None                                                                                                                                      |                                                                                     |
|    |                                                                                                              | AgeneBio has supported (financially reimbursed) travel to scientific meetings in the past.                                                                         |                                                                                     |
|    |                                                                                                              |                                                                                                                                                                    |                                                                                     |
|    |                                                                                                              |                                                                                                                                                                    |                                                                                     |
| 8  | Patents planned, issued or pending                                                                           | <input checked="" type="checkbox"/> None                                                                                                                           |                                                                                     |
|    |                                                                                                              |                                                                                                                                                                    |                                                                                     |
|    |                                                                                                              |                                                                                                                                                                    |                                                                                     |
|    |                                                                                                              |                                                                                                                                                                    |                                                                                     |
| 9  | Participation on a Data Safety Monitoring Board or Advisory Board                                            | <input checked="" type="checkbox"/> None                                                                                                                           |                                                                                     |
|    |                                                                                                              |                                                                                                                                                                    |                                                                                     |
|    |                                                                                                              |                                                                                                                                                                    |                                                                                     |
|    |                                                                                                              |                                                                                                                                                                    |                                                                                     |
| 10 | Leadership or fiduciary role in other board, society, committee or advocacy group, paid or unpaid            | <input checked="" type="checkbox"/> None                                                                                                                           |                                                                                     |
|    |                                                                                                              |                                                                                                                                                                    |                                                                                     |
|    |                                                                                                              |                                                                                                                                                                    |                                                                                     |
|    |                                                                                                              |                                                                                                                                                                    |                                                                                     |

|    |                                                                                  | Name all entities with whom you have this relationship or indicate none (add rows as needed) | Specifications/Comments (e.g., if payments were made to you or to your institution) |
|----|----------------------------------------------------------------------------------|----------------------------------------------------------------------------------------------|-------------------------------------------------------------------------------------|
| 11 | Stock or stock options                                                           | <input type="checkbox"/> None                                                                |                                                                                     |
|    |                                                                                  | Stock options provided by AgeneBio were relinquished                                         |                                                                                     |
|    |                                                                                  |                                                                                              |                                                                                     |
|    |                                                                                  |                                                                                              |                                                                                     |
| 12 | Receipt of equipment, materials, drugs, medical writing, gifts or other services | <input checked="" type="checkbox"/> None                                                     |                                                                                     |
|    |                                                                                  |                                                                                              |                                                                                     |
|    |                                                                                  |                                                                                              |                                                                                     |
|    |                                                                                  |                                                                                              |                                                                                     |
| 13 | Other financial or non-financial interests                                       | <input checked="" type="checkbox"/> None                                                     |                                                                                     |
|    |                                                                                  |                                                                                              |                                                                                     |
|    |                                                                                  |                                                                                              |                                                                                     |
|    |                                                                                  |                                                                                              |                                                                                     |

Please place an "X" next to the following statement to indicate your agreement:

I certify that I have answered every question and have not altered the wording of any of the questions on this form.

## ICMJE DISCLOSURE FORM

**Date:** 10/9/2023

**Your Name:** Marilyn Albert

**Manuscript Title:** The HOPE4MCI study: A randomized double-blind assessment of AGB101 for the treatment of MCI due to AD

**Manuscript Number (if known):** TRCI-D-23-00082R1

In the interest of transparency, we ask you to disclose all relationships/activities/interests listed below that are related to the content of your manuscript. "Related" means any relation with for-profit or not-for-profit third parties whose interests may be affected by the content of the manuscript. Disclosure represents a commitment to transparency and does not necessarily indicate a bias. If you are in doubt about whether to list a relationship/activity/interest, it is preferable that you do so.

The author's relationships/activities/interests should be defined broadly. For example, if your manuscript pertains to the epidemiology of hypertension, you should declare all relationships with manufacturers of antihypertensive medication, even if that medication is not mentioned in the manuscript.

In item #1 below, report all support for the work reported in this manuscript without time limit. For all other items, the time frame for disclosure is the past 36 months.

|                                                    | Name all entities with whom you have this relationship or indicate none (add rows as needed)                                                                                   | Specifications/Comments (e.g., if payments were made to you or to your institution)                                                                                                                                                                                                                                                                                                 |              |                         |  |  |                                           |  |
|----------------------------------------------------|--------------------------------------------------------------------------------------------------------------------------------------------------------------------------------|-------------------------------------------------------------------------------------------------------------------------------------------------------------------------------------------------------------------------------------------------------------------------------------------------------------------------------------------------------------------------------------|--------------|-------------------------|--|--|-------------------------------------------|--|
| Time frame: Since the initial planning of the work |                                                                                                                                                                                |                                                                                                                                                                                                                                                                                                                                                                                     |              |                         |  |  |                                           |  |
| <b>1</b>                                           | All support for the present manuscript (e.g., funding, provision of study materials, medical writing, article processing charges, etc.)<br><b>No time limit for this item.</b> | <input type="checkbox"/> <b>None</b><br><table border="1" style="width: 100%; border-collapse: collapse; margin-top: 5px;"> <tr> <td style="width: 60%;">R01 AG048349</td> <td>Payments to institution</td> </tr> <tr> <td> </td> <td> </td> </tr> <tr> <td colspan="2" style="text-align: center; font-size: small;">Click the tab key to add additional rows.</td> </tr> </table> | R01 AG048349 | Payments to institution |  |  | Click the tab key to add additional rows. |  |
| R01 AG048349                                       | Payments to institution                                                                                                                                                        |                                                                                                                                                                                                                                                                                                                                                                                     |              |                         |  |  |                                           |  |
|                                                    |                                                                                                                                                                                |                                                                                                                                                                                                                                                                                                                                                                                     |              |                         |  |  |                                           |  |
| Click the tab key to add additional rows.          |                                                                                                                                                                                |                                                                                                                                                                                                                                                                                                                                                                                     |              |                         |  |  |                                           |  |
| Time frame: past 36 months                         |                                                                                                                                                                                |                                                                                                                                                                                                                                                                                                                                                                                     |              |                         |  |  |                                           |  |
| <b>2</b>                                           | Grants or contracts from any entity (if not indicated in item #1 above).                                                                                                       | <input checked="" type="checkbox"/> <b>None</b><br><table border="1" style="width: 100%; border-collapse: collapse; margin-top: 5px;"> <tr> <td style="width: 60%;"> </td> <td> </td> </tr> <tr> <td> </td> <td> </td> </tr> <tr> <td> </td> <td> </td> </tr> </table>                                                                                                              |              |                         |  |  |                                           |  |
|                                                    |                                                                                                                                                                                |                                                                                                                                                                                                                                                                                                                                                                                     |              |                         |  |  |                                           |  |
|                                                    |                                                                                                                                                                                |                                                                                                                                                                                                                                                                                                                                                                                     |              |                         |  |  |                                           |  |
|                                                    |                                                                                                                                                                                |                                                                                                                                                                                                                                                                                                                                                                                     |              |                         |  |  |                                           |  |
| <b>3</b>                                           | Royalties or licenses                                                                                                                                                          | <input checked="" type="checkbox"/> <b>None</b><br><table border="1" style="width: 100%; border-collapse: collapse; margin-top: 5px;"> <tr> <td style="width: 60%;"> </td> <td> </td> </tr> <tr> <td> </td> <td> </td> </tr> <tr> <td> </td> <td> </td> </tr> </table>                                                                                                              |              |                         |  |  |                                           |  |
|                                                    |                                                                                                                                                                                |                                                                                                                                                                                                                                                                                                                                                                                     |              |                         |  |  |                                           |  |
|                                                    |                                                                                                                                                                                |                                                                                                                                                                                                                                                                                                                                                                                     |              |                         |  |  |                                           |  |
|                                                    |                                                                                                                                                                                |                                                                                                                                                                                                                                                                                                                                                                                     |              |                         |  |  |                                           |  |

|    |                                                                                                              | Name all entities with whom you have this relationship or indicate none (add rows as needed)                                                                                                                                                                                                                  | Specifications/Comments (e.g., if payments were made to you or to your institution) |  |  |  |  |  |  |
|----|--------------------------------------------------------------------------------------------------------------|---------------------------------------------------------------------------------------------------------------------------------------------------------------------------------------------------------------------------------------------------------------------------------------------------------------|-------------------------------------------------------------------------------------|--|--|--|--|--|--|
| 4  | Consulting fees                                                                                              | <input checked="" type="checkbox"/> None<br><table border="1" style="width: 100%; border-collapse: collapse;"> <tr><td style="width: 50%; height: 15px;"></td><td style="width: 50%;"></td></tr> <tr><td style="height: 15px;"></td><td></td></tr> <tr><td style="height: 15px;"></td><td></td></tr> </table> |                                                                                     |  |  |  |  |  |  |
|    |                                                                                                              |                                                                                                                                                                                                                                                                                                               |                                                                                     |  |  |  |  |  |  |
|    |                                                                                                              |                                                                                                                                                                                                                                                                                                               |                                                                                     |  |  |  |  |  |  |
|    |                                                                                                              |                                                                                                                                                                                                                                                                                                               |                                                                                     |  |  |  |  |  |  |
| 5  | Payment or honoraria for lectures, presentations, speakers bureaus, manuscript writing or educational events | <input checked="" type="checkbox"/> None<br><table border="1" style="width: 100%; border-collapse: collapse;"> <tr><td style="width: 50%; height: 15px;"></td><td style="width: 50%;"></td></tr> <tr><td style="height: 15px;"></td><td></td></tr> <tr><td style="height: 15px;"></td><td></td></tr> </table> |                                                                                     |  |  |  |  |  |  |
|    |                                                                                                              |                                                                                                                                                                                                                                                                                                               |                                                                                     |  |  |  |  |  |  |
|    |                                                                                                              |                                                                                                                                                                                                                                                                                                               |                                                                                     |  |  |  |  |  |  |
|    |                                                                                                              |                                                                                                                                                                                                                                                                                                               |                                                                                     |  |  |  |  |  |  |
| 6  | Payment for expert testimony                                                                                 | <input checked="" type="checkbox"/> None<br><table border="1" style="width: 100%; border-collapse: collapse;"> <tr><td style="width: 50%; height: 15px;"></td><td style="width: 50%;"></td></tr> <tr><td style="height: 15px;"></td><td></td></tr> <tr><td style="height: 15px;"></td><td></td></tr> </table> |                                                                                     |  |  |  |  |  |  |
|    |                                                                                                              |                                                                                                                                                                                                                                                                                                               |                                                                                     |  |  |  |  |  |  |
|    |                                                                                                              |                                                                                                                                                                                                                                                                                                               |                                                                                     |  |  |  |  |  |  |
|    |                                                                                                              |                                                                                                                                                                                                                                                                                                               |                                                                                     |  |  |  |  |  |  |
| 7  | Support for attending meetings and/or travel                                                                 | <input checked="" type="checkbox"/> None<br><table border="1" style="width: 100%; border-collapse: collapse;"> <tr><td style="width: 50%; height: 15px;"></td><td style="width: 50%;"></td></tr> <tr><td style="height: 15px;"></td><td></td></tr> <tr><td style="height: 15px;"></td><td></td></tr> </table> |                                                                                     |  |  |  |  |  |  |
|    |                                                                                                              |                                                                                                                                                                                                                                                                                                               |                                                                                     |  |  |  |  |  |  |
|    |                                                                                                              |                                                                                                                                                                                                                                                                                                               |                                                                                     |  |  |  |  |  |  |
|    |                                                                                                              |                                                                                                                                                                                                                                                                                                               |                                                                                     |  |  |  |  |  |  |
| 8  | Patents planned, issued or pending                                                                           | <input checked="" type="checkbox"/> None<br><table border="1" style="width: 100%; border-collapse: collapse;"> <tr><td style="width: 50%; height: 15px;"></td><td style="width: 50%;"></td></tr> <tr><td style="height: 15px;"></td><td></td></tr> <tr><td style="height: 15px;"></td><td></td></tr> </table> |                                                                                     |  |  |  |  |  |  |
|    |                                                                                                              |                                                                                                                                                                                                                                                                                                               |                                                                                     |  |  |  |  |  |  |
|    |                                                                                                              |                                                                                                                                                                                                                                                                                                               |                                                                                     |  |  |  |  |  |  |
|    |                                                                                                              |                                                                                                                                                                                                                                                                                                               |                                                                                     |  |  |  |  |  |  |
| 9  | Participation on a Data Safety Monitoring Board or Advisory Board                                            | <input checked="" type="checkbox"/> None<br><table border="1" style="width: 100%; border-collapse: collapse;"> <tr><td style="width: 50%; height: 15px;"></td><td style="width: 50%;"></td></tr> <tr><td style="height: 15px;"></td><td></td></tr> <tr><td style="height: 15px;"></td><td></td></tr> </table> |                                                                                     |  |  |  |  |  |  |
|    |                                                                                                              |                                                                                                                                                                                                                                                                                                               |                                                                                     |  |  |  |  |  |  |
|    |                                                                                                              |                                                                                                                                                                                                                                                                                                               |                                                                                     |  |  |  |  |  |  |
|    |                                                                                                              |                                                                                                                                                                                                                                                                                                               |                                                                                     |  |  |  |  |  |  |
| 10 | Leadership or fiduciary role in other board, society, committee or advocacy group, paid or unpaid            | <input checked="" type="checkbox"/> None<br><table border="1" style="width: 100%; border-collapse: collapse;"> <tr><td style="width: 50%; height: 15px;"></td><td style="width: 50%;"></td></tr> <tr><td style="height: 15px;"></td><td></td></tr> <tr><td style="height: 15px;"></td><td></td></tr> </table> |                                                                                     |  |  |  |  |  |  |
|    |                                                                                                              |                                                                                                                                                                                                                                                                                                               |                                                                                     |  |  |  |  |  |  |
|    |                                                                                                              |                                                                                                                                                                                                                                                                                                               |                                                                                     |  |  |  |  |  |  |
|    |                                                                                                              |                                                                                                                                                                                                                                                                                                               |                                                                                     |  |  |  |  |  |  |



|    |                                                                                  | Name all entities with whom you have this relationship or indicate none (add rows as needed) | Specifications/Comments (e.g., if payments were made to you or to your institution) |
|----|----------------------------------------------------------------------------------|----------------------------------------------------------------------------------------------|-------------------------------------------------------------------------------------|
| 11 | Stock or stock options                                                           | <input checked="" type="checkbox"/> None                                                     |                                                                                     |
|    |                                                                                  |                                                                                              |                                                                                     |
|    |                                                                                  |                                                                                              |                                                                                     |
|    |                                                                                  |                                                                                              |                                                                                     |
| 12 | Receipt of equipment, materials, drugs, medical writing, gifts or other services | <input checked="" type="checkbox"/> None                                                     |                                                                                     |
|    |                                                                                  |                                                                                              |                                                                                     |
|    |                                                                                  |                                                                                              |                                                                                     |
|    |                                                                                  |                                                                                              |                                                                                     |
| 13 | Other financial or non-financial interests                                       | <input checked="" type="checkbox"/> None                                                     |                                                                                     |
|    |                                                                                  |                                                                                              |                                                                                     |
|    |                                                                                  |                                                                                              |                                                                                     |
|    |                                                                                  |                                                                                              |                                                                                     |

Please place an "X" next to the following statement to indicate your agreement:

I certify that I have answered every question and have not altered the wording of any of the questions on this form.

## ICMJE DISCLOSURE FORM

**Date:** 10/6/2023

**Your Name:** Sharon Cohen

**Manuscript Title:** The HOPE4MCI study: A randomized double-blind assessment of AGB101 for the treatment of MCI due to AD

**Manuscript Number (if known):** TRCI-D-23-00082R1

In the interest of transparency, we ask you to disclose all relationships/activities/interests listed below that are related to the content of your manuscript. "Related" means any relation with for-profit or not-for-profit third parties whose interests may be affected by the content of the manuscript. Disclosure represents a commitment to transparency and does not necessarily indicate a bias. If you are in doubt about whether to list a relationship/activity/interest, it is preferable that you do so.

The author's relationships/activities/interests should be defined broadly. For example, if your manuscript pertains to the epidemiology of hypertension, you should declare all relationships with manufacturers of antihypertensive medication, even if that medication is not mentioned in the manuscript.

In item #1 below, report all support for the work reported in this manuscript without time limit. For all other items, the time frame for disclosure is the past 36 months.

|                                                    | Name all entities with whom you have this relationship or indicate none (add rows as needed)                                                                                   | Specifications/Comments (e.g., if payments were made to you or to your institution)                                                                                                                                                                                                                                                                                                                                                                                                                                                                                                                                                                                                                                                                                                                                                                                                                                                                                                                                                                                                                            |         |                                           |         |                                           |           |                                           |         |                                           |        |                                           |         |                                           |       |                                           |           |                                           |         |                                           |              |                                           |       |                                           |          |                                           |
|----------------------------------------------------|--------------------------------------------------------------------------------------------------------------------------------------------------------------------------------|----------------------------------------------------------------------------------------------------------------------------------------------------------------------------------------------------------------------------------------------------------------------------------------------------------------------------------------------------------------------------------------------------------------------------------------------------------------------------------------------------------------------------------------------------------------------------------------------------------------------------------------------------------------------------------------------------------------------------------------------------------------------------------------------------------------------------------------------------------------------------------------------------------------------------------------------------------------------------------------------------------------------------------------------------------------------------------------------------------------|---------|-------------------------------------------|---------|-------------------------------------------|-----------|-------------------------------------------|---------|-------------------------------------------|--------|-------------------------------------------|---------|-------------------------------------------|-------|-------------------------------------------|-----------|-------------------------------------------|---------|-------------------------------------------|--------------|-------------------------------------------|-------|-------------------------------------------|----------|-------------------------------------------|
| Time frame: Since the initial planning of the work |                                                                                                                                                                                |                                                                                                                                                                                                                                                                                                                                                                                                                                                                                                                                                                                                                                                                                                                                                                                                                                                                                                                                                                                                                                                                                                                |         |                                           |         |                                           |           |                                           |         |                                           |        |                                           |         |                                           |       |                                           |           |                                           |         |                                           |              |                                           |       |                                           |          |                                           |
| 1                                                  | All support for the present manuscript (e.g., funding, provision of study materials, medical writing, article processing charges, etc.)<br><b>No time limit for this item.</b> | <input checked="" type="checkbox"/> <b>None</b><br><table border="1" style="width: 100%; border-collapse: collapse; margin-top: 10px;"> <tr><td style="height: 20px;"> </td><td style="width: 20px;"> </td></tr> <tr><td style="height: 20px;"> </td><td style="width: 20px;"> </td></tr> <tr><td style="height: 20px;"> </td><td style="width: 20px;"> </td></tr> </table> <p style="font-size: small; color: gray; margin-top: 5px;">Click the tab key to add additional rows.</p>                                                                                                                                                                                                                                                                                                                                                                                                                                                                                                                                                                                                                           |         |                                           |         |                                           |           |                                           |         |                                           |        |                                           |         |                                           |       |                                           |           |                                           |         |                                           |              |                                           |       |                                           |          |                                           |
|                                                    |                                                                                                                                                                                |                                                                                                                                                                                                                                                                                                                                                                                                                                                                                                                                                                                                                                                                                                                                                                                                                                                                                                                                                                                                                                                                                                                |         |                                           |         |                                           |           |                                           |         |                                           |        |                                           |         |                                           |       |                                           |           |                                           |         |                                           |              |                                           |       |                                           |          |                                           |
|                                                    |                                                                                                                                                                                |                                                                                                                                                                                                                                                                                                                                                                                                                                                                                                                                                                                                                                                                                                                                                                                                                                                                                                                                                                                                                                                                                                                |         |                                           |         |                                           |           |                                           |         |                                           |        |                                           |         |                                           |       |                                           |           |                                           |         |                                           |              |                                           |       |                                           |          |                                           |
|                                                    |                                                                                                                                                                                |                                                                                                                                                                                                                                                                                                                                                                                                                                                                                                                                                                                                                                                                                                                                                                                                                                                                                                                                                                                                                                                                                                                |         |                                           |         |                                           |           |                                           |         |                                           |        |                                           |         |                                           |       |                                           |           |                                           |         |                                           |              |                                           |       |                                           |          |                                           |
| Time frame: past 36 months                         |                                                                                                                                                                                |                                                                                                                                                                                                                                                                                                                                                                                                                                                                                                                                                                                                                                                                                                                                                                                                                                                                                                                                                                                                                                                                                                                |         |                                           |         |                                           |           |                                           |         |                                           |        |                                           |         |                                           |       |                                           |           |                                           |         |                                           |              |                                           |       |                                           |          |                                           |
| 2                                                  | Grants or contracts from any entity (if not indicated in item #1 above).                                                                                                       | <input type="checkbox"/> <b>None</b><br><table border="1" style="width: 100%; border-collapse: collapse; margin-top: 10px;"> <tr><td style="width: 70%;">Alnylam</td><td>Research grants paid to institution only.</td></tr> <tr><td>Alzheon</td><td>Research grants paid to institution only.</td></tr> <tr><td>Agene Bio</td><td>Research grants paid to institution only.</td></tr> <tr><td>Alector</td><td>Research grants paid to institution only.</td></tr> <tr><td>Biogen</td><td>Research grants paid to institution only.</td></tr> <tr><td>Cassava</td><td>Research grants paid to institution only.</td></tr> <tr><td>Eisai</td><td>Research grants paid to institution only.</td></tr> <tr><td>Eli Lilly</td><td>Research grants paid to institution only.</td></tr> <tr><td>Janssen</td><td>Research grants paid to institution only.</td></tr> <tr><td>Novo Nordisk</td><td>Research grants paid to institution only.</td></tr> <tr><td>Roche</td><td>Research grants paid to institution only.</td></tr> <tr><td>RetiSpec</td><td>Research grants paid to institution only.</td></tr> </table> | Alnylam | Research grants paid to institution only. | Alzheon | Research grants paid to institution only. | Agene Bio | Research grants paid to institution only. | Alector | Research grants paid to institution only. | Biogen | Research grants paid to institution only. | Cassava | Research grants paid to institution only. | Eisai | Research grants paid to institution only. | Eli Lilly | Research grants paid to institution only. | Janssen | Research grants paid to institution only. | Novo Nordisk | Research grants paid to institution only. | Roche | Research grants paid to institution only. | RetiSpec | Research grants paid to institution only. |
| Alnylam                                            | Research grants paid to institution only.                                                                                                                                      |                                                                                                                                                                                                                                                                                                                                                                                                                                                                                                                                                                                                                                                                                                                                                                                                                                                                                                                                                                                                                                                                                                                |         |                                           |         |                                           |           |                                           |         |                                           |        |                                           |         |                                           |       |                                           |           |                                           |         |                                           |              |                                           |       |                                           |          |                                           |
| Alzheon                                            | Research grants paid to institution only.                                                                                                                                      |                                                                                                                                                                                                                                                                                                                                                                                                                                                                                                                                                                                                                                                                                                                                                                                                                                                                                                                                                                                                                                                                                                                |         |                                           |         |                                           |           |                                           |         |                                           |        |                                           |         |                                           |       |                                           |           |                                           |         |                                           |              |                                           |       |                                           |          |                                           |
| Agene Bio                                          | Research grants paid to institution only.                                                                                                                                      |                                                                                                                                                                                                                                                                                                                                                                                                                                                                                                                                                                                                                                                                                                                                                                                                                                                                                                                                                                                                                                                                                                                |         |                                           |         |                                           |           |                                           |         |                                           |        |                                           |         |                                           |       |                                           |           |                                           |         |                                           |              |                                           |       |                                           |          |                                           |
| Alector                                            | Research grants paid to institution only.                                                                                                                                      |                                                                                                                                                                                                                                                                                                                                                                                                                                                                                                                                                                                                                                                                                                                                                                                                                                                                                                                                                                                                                                                                                                                |         |                                           |         |                                           |           |                                           |         |                                           |        |                                           |         |                                           |       |                                           |           |                                           |         |                                           |              |                                           |       |                                           |          |                                           |
| Biogen                                             | Research grants paid to institution only.                                                                                                                                      |                                                                                                                                                                                                                                                                                                                                                                                                                                                                                                                                                                                                                                                                                                                                                                                                                                                                                                                                                                                                                                                                                                                |         |                                           |         |                                           |           |                                           |         |                                           |        |                                           |         |                                           |       |                                           |           |                                           |         |                                           |              |                                           |       |                                           |          |                                           |
| Cassava                                            | Research grants paid to institution only.                                                                                                                                      |                                                                                                                                                                                                                                                                                                                                                                                                                                                                                                                                                                                                                                                                                                                                                                                                                                                                                                                                                                                                                                                                                                                |         |                                           |         |                                           |           |                                           |         |                                           |        |                                           |         |                                           |       |                                           |           |                                           |         |                                           |              |                                           |       |                                           |          |                                           |
| Eisai                                              | Research grants paid to institution only.                                                                                                                                      |                                                                                                                                                                                                                                                                                                                                                                                                                                                                                                                                                                                                                                                                                                                                                                                                                                                                                                                                                                                                                                                                                                                |         |                                           |         |                                           |           |                                           |         |                                           |        |                                           |         |                                           |       |                                           |           |                                           |         |                                           |              |                                           |       |                                           |          |                                           |
| Eli Lilly                                          | Research grants paid to institution only.                                                                                                                                      |                                                                                                                                                                                                                                                                                                                                                                                                                                                                                                                                                                                                                                                                                                                                                                                                                                                                                                                                                                                                                                                                                                                |         |                                           |         |                                           |           |                                           |         |                                           |        |                                           |         |                                           |       |                                           |           |                                           |         |                                           |              |                                           |       |                                           |          |                                           |
| Janssen                                            | Research grants paid to institution only.                                                                                                                                      |                                                                                                                                                                                                                                                                                                                                                                                                                                                                                                                                                                                                                                                                                                                                                                                                                                                                                                                                                                                                                                                                                                                |         |                                           |         |                                           |           |                                           |         |                                           |        |                                           |         |                                           |       |                                           |           |                                           |         |                                           |              |                                           |       |                                           |          |                                           |
| Novo Nordisk                                       | Research grants paid to institution only.                                                                                                                                      |                                                                                                                                                                                                                                                                                                                                                                                                                                                                                                                                                                                                                                                                                                                                                                                                                                                                                                                                                                                                                                                                                                                |         |                                           |         |                                           |           |                                           |         |                                           |        |                                           |         |                                           |       |                                           |           |                                           |         |                                           |              |                                           |       |                                           |          |                                           |
| Roche                                              | Research grants paid to institution only.                                                                                                                                      |                                                                                                                                                                                                                                                                                                                                                                                                                                                                                                                                                                                                                                                                                                                                                                                                                                                                                                                                                                                                                                                                                                                |         |                                           |         |                                           |           |                                           |         |                                           |        |                                           |         |                                           |       |                                           |           |                                           |         |                                           |              |                                           |       |                                           |          |                                           |
| RetiSpec                                           | Research grants paid to institution only.                                                                                                                                      |                                                                                                                                                                                                                                                                                                                                                                                                                                                                                                                                                                                                                                                                                                                                                                                                                                                                                                                                                                                                                                                                                                                |         |                                           |         |                                           |           |                                           |         |                                           |        |                                           |         |                                           |       |                                           |           |                                           |         |                                           |              |                                           |       |                                           |          |                                           |

|   |                                                                                                              | Name all entities with whom you have this relationship or indicate none (add rows as needed) | Specifications/Comments (e.g., if payments were made to you or to your institution) |
|---|--------------------------------------------------------------------------------------------------------------|----------------------------------------------------------------------------------------------|-------------------------------------------------------------------------------------|
| 3 | Royalties or licenses                                                                                        | <input checked="" type="checkbox"/> <b>None</b>                                              |                                                                                     |
|   |                                                                                                              |                                                                                              |                                                                                     |
|   |                                                                                                              |                                                                                              |                                                                                     |
|   |                                                                                                              |                                                                                              |                                                                                     |
| 4 | Consulting fees                                                                                              | <input type="checkbox"/> <b>None</b>                                                         |                                                                                     |
|   |                                                                                                              | Alnylam                                                                                      | Payments to institution only                                                        |
|   |                                                                                                              | Biogen                                                                                       | Payments to institution only                                                        |
|   |                                                                                                              | Cassava                                                                                      | Payments to institution only                                                        |
|   |                                                                                                              | Eisai                                                                                        | Payments to institution only                                                        |
|   |                                                                                                              | Eli Lilly                                                                                    | Payments to institution only                                                        |
|   |                                                                                                              | INmune Bio                                                                                   | Payments to institution only                                                        |
|   |                                                                                                              | Novo Nordisk                                                                                 | Payments to institution only                                                        |
|   |                                                                                                              | ProMIS Neuroscience                                                                          | Payments to institution only                                                        |
|   |                                                                                                              | Roche                                                                                        | Payments to institution only                                                        |
|   |                                                                                                              | SciNeuro                                                                                     | Payments to institution only                                                        |
|   |                                                                                                              |                                                                                              |                                                                                     |
|   |                                                                                                              |                                                                                              |                                                                                     |
|   |                                                                                                              |                                                                                              |                                                                                     |
| 5 | Payment or honoraria for lectures, presentations, speakers bureaus, manuscript writing or educational events | <input checked="" type="checkbox"/> <b>None</b>                                              |                                                                                     |
|   |                                                                                                              |                                                                                              |                                                                                     |
|   |                                                                                                              |                                                                                              |                                                                                     |
|   |                                                                                                              |                                                                                              |                                                                                     |
| 6 | Payment for expert testimony                                                                                 | <input checked="" type="checkbox"/> <b>None</b>                                              |                                                                                     |
|   |                                                                                                              |                                                                                              |                                                                                     |
|   |                                                                                                              |                                                                                              |                                                                                     |
|   |                                                                                                              |                                                                                              |                                                                                     |

|    |                                                                                                   | Name all entities with whom you have this relationship or indicate none (add rows as needed) | Specifications/Comments (e.g., if payments were made to you or to your institution) |
|----|---------------------------------------------------------------------------------------------------|----------------------------------------------------------------------------------------------|-------------------------------------------------------------------------------------|
| 7  | Support for attending meetings and/or travel                                                      | <input checked="" type="checkbox"/> None                                                     |                                                                                     |
|    |                                                                                                   |                                                                                              |                                                                                     |
|    |                                                                                                   |                                                                                              |                                                                                     |
| 8  | Patents planned, issued or pending                                                                | <input checked="" type="checkbox"/> None                                                     |                                                                                     |
|    |                                                                                                   |                                                                                              |                                                                                     |
|    |                                                                                                   |                                                                                              |                                                                                     |
| 9  | Participation on a Data Safety Monitoring Board or Advisory Board                                 | <input type="checkbox"/> None                                                                |                                                                                     |
|    |                                                                                                   | Biogen                                                                                       | No personal fees for advisory board work                                            |
|    |                                                                                                   | Eisai                                                                                        | No personal fees for advisory board work                                            |
|    |                                                                                                   | Eli Lilly                                                                                    | No personal fees for advisory board work                                            |
|    |                                                                                                   | Novo Nordisk                                                                                 | No personal fees for advisory board work                                            |
|    |                                                                                                   | Roche                                                                                        | No personal fees for advisory board work                                            |
| 10 | Leadership or fiduciary role in other board, society, committee or advocacy group, paid or unpaid | <input checked="" type="checkbox"/> None                                                     |                                                                                     |
|    |                                                                                                   |                                                                                              |                                                                                     |
|    |                                                                                                   |                                                                                              |                                                                                     |
| 11 | Stock or stock options                                                                            | <input checked="" type="checkbox"/> None                                                     |                                                                                     |
|    |                                                                                                   |                                                                                              |                                                                                     |
|    |                                                                                                   |                                                                                              |                                                                                     |
| 12 | Receipt of equipment, materials, drugs, medical writing, gifts or other services                  | <input checked="" type="checkbox"/> None                                                     |                                                                                     |
|    |                                                                                                   |                                                                                              |                                                                                     |
|    |                                                                                                   |                                                                                              |                                                                                     |
| 13 | Other financial or non-financial interests                                                        | <input checked="" type="checkbox"/> None                                                     |                                                                                     |
|    |                                                                                                   |                                                                                              |                                                                                     |
|    |                                                                                                   |                                                                                              |                                                                                     |

Please place an "X" next to the following statement to indicate your agreement:

I certify that I have answered every question and have not altered the wording of any of the questions on this form.



## ICMJE DISCLOSURE FORM

**Date:** 10/9/2023

**Your Name:** Scott L Zeger

**Manuscript Title:** The HOPE4MCI study: A randomized double-blind assessment of AGB101 for the treatment of MCI due to AD

**Manuscript Number (if known):** TRCI-D-23-00082R1

In the interest of transparency, we ask you to disclose all relationships/activities/interests listed below that are related to the content of your manuscript. "Related" means any relation with for-profit or not-for-profit third parties whose interests may be affected by the content of the manuscript. Disclosure represents a commitment to transparency and does not necessarily indicate a bias. If you are in doubt about whether to list a relationship/activity/interest, it is preferable that you do so.

The author's relationships/activities/interests should be defined broadly. For example, if your manuscript pertains to the epidemiology of hypertension, you should declare all relationships with manufacturers of antihypertensive medication, even if that medication is not mentioned in the manuscript.

In item #1 below, report all support for the work reported in this manuscript without time limit. For all other items, the time frame for disclosure is the past 36 months.

|                                                    | Name all entities with whom you have this relationship or indicate none (add rows as needed)                                                                                   | Specifications/Comments (e.g., if payments were made to you or to your institution)                                                                                                                                                                                                                                                                       |  |  |  |  |  |  |
|----------------------------------------------------|--------------------------------------------------------------------------------------------------------------------------------------------------------------------------------|-----------------------------------------------------------------------------------------------------------------------------------------------------------------------------------------------------------------------------------------------------------------------------------------------------------------------------------------------------------|--|--|--|--|--|--|
| Time frame: Since the initial planning of the work |                                                                                                                                                                                |                                                                                                                                                                                                                                                                                                                                                           |  |  |  |  |  |  |
| <b>1</b>                                           | All support for the present manuscript (e.g., funding, provision of study materials, medical writing, article processing charges, etc.)<br><b>No time limit for this item.</b> | <input checked="" type="checkbox"/> <b>None</b><br><table border="1" style="width: 100%; height: 40px; margin-top: 5px;"> <tr><td style="width: 60%;"></td><td></td></tr> <tr><td></td><td></td></tr> <tr><td></td><td></td></tr> </table> <p style="font-size: small; text-align: right; margin-top: 5px;">Click the tab key to add additional rows.</p> |  |  |  |  |  |  |
|                                                    |                                                                                                                                                                                |                                                                                                                                                                                                                                                                                                                                                           |  |  |  |  |  |  |
|                                                    |                                                                                                                                                                                |                                                                                                                                                                                                                                                                                                                                                           |  |  |  |  |  |  |
|                                                    |                                                                                                                                                                                |                                                                                                                                                                                                                                                                                                                                                           |  |  |  |  |  |  |
| Time frame: past 36 months                         |                                                                                                                                                                                |                                                                                                                                                                                                                                                                                                                                                           |  |  |  |  |  |  |
| <b>2</b>                                           | Grants or contracts from any entity (if not indicated in item #1 above).                                                                                                       | <input checked="" type="checkbox"/> <b>None</b><br><table border="1" style="width: 100%; height: 40px; margin-top: 5px;"> <tr><td style="width: 60%;"></td><td></td></tr> <tr><td></td><td></td></tr> <tr><td></td><td></td></tr> </table>                                                                                                                |  |  |  |  |  |  |
|                                                    |                                                                                                                                                                                |                                                                                                                                                                                                                                                                                                                                                           |  |  |  |  |  |  |
|                                                    |                                                                                                                                                                                |                                                                                                                                                                                                                                                                                                                                                           |  |  |  |  |  |  |
|                                                    |                                                                                                                                                                                |                                                                                                                                                                                                                                                                                                                                                           |  |  |  |  |  |  |
| <b>3</b>                                           | Royalties or licenses                                                                                                                                                          | <input checked="" type="checkbox"/> <b>None</b><br><table border="1" style="width: 100%; height: 40px; margin-top: 5px;"> <tr><td style="width: 60%;"></td><td></td></tr> <tr><td></td><td></td></tr> <tr><td></td><td></td></tr> </table>                                                                                                                |  |  |  |  |  |  |
|                                                    |                                                                                                                                                                                |                                                                                                                                                                                                                                                                                                                                                           |  |  |  |  |  |  |
|                                                    |                                                                                                                                                                                |                                                                                                                                                                                                                                                                                                                                                           |  |  |  |  |  |  |
|                                                    |                                                                                                                                                                                |                                                                                                                                                                                                                                                                                                                                                           |  |  |  |  |  |  |

|    |                                                                                                              | Name all entities with whom you have this relationship or indicate none (add rows as needed)                                                                             | Specifications/Comments (e.g., if payments were made to you or to your institution) |  |  |  |  |  |  |
|----|--------------------------------------------------------------------------------------------------------------|--------------------------------------------------------------------------------------------------------------------------------------------------------------------------|-------------------------------------------------------------------------------------|--|--|--|--|--|--|
| 4  | Consulting fees                                                                                              | <input checked="" type="checkbox"/> <b>None</b><br><table border="1"> <tr><td> </td><td> </td></tr> <tr><td> </td><td> </td></tr> <tr><td> </td><td> </td></tr> </table> |                                                                                     |  |  |  |  |  |  |
|    |                                                                                                              |                                                                                                                                                                          |                                                                                     |  |  |  |  |  |  |
|    |                                                                                                              |                                                                                                                                                                          |                                                                                     |  |  |  |  |  |  |
|    |                                                                                                              |                                                                                                                                                                          |                                                                                     |  |  |  |  |  |  |
| 5  | Payment or honoraria for lectures, presentations, speakers bureaus, manuscript writing or educational events | <input checked="" type="checkbox"/> <b>None</b><br><table border="1"> <tr><td> </td><td> </td></tr> <tr><td> </td><td> </td></tr> </table>                               |                                                                                     |  |  |  |  |  |  |
|    |                                                                                                              |                                                                                                                                                                          |                                                                                     |  |  |  |  |  |  |
|    |                                                                                                              |                                                                                                                                                                          |                                                                                     |  |  |  |  |  |  |
| 6  | Payment for expert testimony                                                                                 | <input checked="" type="checkbox"/> <b>None</b><br><table border="1"> <tr><td> </td><td> </td></tr> <tr><td> </td><td> </td></tr> </table>                               |                                                                                     |  |  |  |  |  |  |
|    |                                                                                                              |                                                                                                                                                                          |                                                                                     |  |  |  |  |  |  |
|    |                                                                                                              |                                                                                                                                                                          |                                                                                     |  |  |  |  |  |  |
| 7  | Support for attending meetings and/or travel                                                                 | <input checked="" type="checkbox"/> <b>None</b><br><table border="1"> <tr><td> </td><td> </td></tr> <tr><td> </td><td> </td></tr> </table>                               |                                                                                     |  |  |  |  |  |  |
|    |                                                                                                              |                                                                                                                                                                          |                                                                                     |  |  |  |  |  |  |
|    |                                                                                                              |                                                                                                                                                                          |                                                                                     |  |  |  |  |  |  |
| 8  | Patents planned, issued or pending                                                                           | <input checked="" type="checkbox"/> <b>None</b><br><table border="1"> <tr><td> </td><td> </td></tr> <tr><td> </td><td> </td></tr> </table>                               |                                                                                     |  |  |  |  |  |  |
|    |                                                                                                              |                                                                                                                                                                          |                                                                                     |  |  |  |  |  |  |
|    |                                                                                                              |                                                                                                                                                                          |                                                                                     |  |  |  |  |  |  |
| 9  | Participation on a Data Safety Monitoring Board or Advisory Board                                            | <input checked="" type="checkbox"/> <b>None</b><br><table border="1"> <tr><td> </td><td> </td></tr> <tr><td> </td><td> </td></tr> </table>                               |                                                                                     |  |  |  |  |  |  |
|    |                                                                                                              |                                                                                                                                                                          |                                                                                     |  |  |  |  |  |  |
|    |                                                                                                              |                                                                                                                                                                          |                                                                                     |  |  |  |  |  |  |
| 10 | Leadership or fiduciary role in other board, society, committee or advocacy group, paid or unpaid            | <input checked="" type="checkbox"/> <b>None</b><br><table border="1"> <tr><td> </td><td> </td></tr> <tr><td> </td><td> </td></tr> </table>                               |                                                                                     |  |  |  |  |  |  |
|    |                                                                                                              |                                                                                                                                                                          |                                                                                     |  |  |  |  |  |  |
|    |                                                                                                              |                                                                                                                                                                          |                                                                                     |  |  |  |  |  |  |

|    |                                                                                  | Name all entities with whom you have this relationship or indicate none (add rows as needed) | Specifications/Comments (e.g., if payments were made to you or to your institution) |
|----|----------------------------------------------------------------------------------|----------------------------------------------------------------------------------------------|-------------------------------------------------------------------------------------|
| 11 | Stock or stock options                                                           | <input checked="" type="checkbox"/> None                                                     |                                                                                     |
|    |                                                                                  |                                                                                              |                                                                                     |
|    |                                                                                  |                                                                                              |                                                                                     |
|    |                                                                                  |                                                                                              |                                                                                     |
| 12 | Receipt of equipment, materials, drugs, medical writing, gifts or other services | <input checked="" type="checkbox"/> None                                                     |                                                                                     |
|    |                                                                                  |                                                                                              |                                                                                     |
|    |                                                                                  |                                                                                              |                                                                                     |
|    |                                                                                  |                                                                                              |                                                                                     |
| 13 | Other financial or non-financial interests                                       | <input checked="" type="checkbox"/> None                                                     |                                                                                     |
|    |                                                                                  |                                                                                              |                                                                                     |
|    |                                                                                  |                                                                                              |                                                                                     |
|    |                                                                                  |                                                                                              |                                                                                     |

Please place an "X" next to the following statement to indicate your agreement:

I certify that I have answered every question and have not altered the wording of any of the questions on this form.



## ICMJE DISCLOSURE FORM

**Date:** 10/10/2023

**Your Name:** Michela Gallagher

**Manuscript Title:** The HOPE4MCI study: A randomized double-blind assessment of AGB101 for the treatment of MCI due to AD

**Manuscript Number (if known):** TRCI-D-23-00082R1

In the interest of transparency, we ask you to disclose all relationships/activities/interests listed below that are related to the content of your manuscript. "Related" means any relation with for-profit or not-for-profit third parties whose interests may be affected by the content of the manuscript. Disclosure represents a commitment to transparency and does not necessarily indicate a bias. If you are in doubt about whether to list a relationship/activity/interest, it is preferable that you do so.

The author's relationships/activities/interests should be defined broadly. For example, if your manuscript pertains to the epidemiology of hypertension, you should declare all relationships with manufacturers of antihypertensive medication, even if that medication is not mentioned in the manuscript.

In item #1 below, report all support for the work reported in this manuscript without time limit. For all other items, the time frame for disclosure is the past 36 months.

|                                                    | Name all entities with whom you have this relationship or indicate none (add rows as needed)                                                                                   | Specifications/Comments (e.g., if payments were made to you or to your institution)                                                                                                                                                                                                                                                                                                                                                                                                                   |                          |                      |                        |                                             |             |                                                              |             |                             |
|----------------------------------------------------|--------------------------------------------------------------------------------------------------------------------------------------------------------------------------------|-------------------------------------------------------------------------------------------------------------------------------------------------------------------------------------------------------------------------------------------------------------------------------------------------------------------------------------------------------------------------------------------------------------------------------------------------------------------------------------------------------|--------------------------|----------------------|------------------------|---------------------------------------------|-------------|--------------------------------------------------------------|-------------|-----------------------------|
| Time frame: Since the initial planning of the work |                                                                                                                                                                                |                                                                                                                                                                                                                                                                                                                                                                                                                                                                                                       |                          |                      |                        |                                             |             |                                                              |             |                             |
| <b>1</b>                                           | All support for the present manuscript (e.g., funding, provision of study materials, medical writing, article processing charges, etc.)<br><b>No time limit for this item.</b> | <input type="checkbox"/> <b>None</b><br><table border="1" style="width: 100%; border-collapse: collapse; margin-top: 5px;"> <tr> <td style="width: 60%;">Phyllis F. Albstein Fund</td> <td></td> </tr> <tr> <td> </td> <td> </td> </tr> <tr> <td> </td> <td style="text-align: right; font-size: small;">Click the tab key to add additional rows.</td> </tr> </table>                                                                                                                                | Phyllis F. Albstein Fund |                      |                        |                                             |             | Click the tab key to add additional rows.                    |             |                             |
| Phyllis F. Albstein Fund                           |                                                                                                                                                                                |                                                                                                                                                                                                                                                                                                                                                                                                                                                                                                       |                          |                      |                        |                                             |             |                                                              |             |                             |
|                                                    |                                                                                                                                                                                |                                                                                                                                                                                                                                                                                                                                                                                                                                                                                                       |                          |                      |                        |                                             |             |                                                              |             |                             |
|                                                    | Click the tab key to add additional rows.                                                                                                                                      |                                                                                                                                                                                                                                                                                                                                                                                                                                                                                                       |                          |                      |                        |                                             |             |                                                              |             |                             |
| Time frame: past 36 months                         |                                                                                                                                                                                |                                                                                                                                                                                                                                                                                                                                                                                                                                                                                                       |                          |                      |                        |                                             |             |                                                              |             |                             |
| <b>2</b>                                           | Grants or contracts from any entity (if not indicated in item #1 above).                                                                                                       | <input type="checkbox"/> <b>None</b><br><table border="1" style="width: 100%; border-collapse: collapse; margin-top: 5px;"> <tr> <td style="width: 60%;">P01AG009973</td> <td>PI Michela Gallagher</td> </tr> <tr> <td>R01AG061091 (inactive)</td> <td>Multi-PI Michela Gallagher &amp; Marilyn Albert</td> </tr> <tr> <td>R01AG078769</td> <td>PI Richard Mohs (R01AG061091 site is one of the trial sites)</td> </tr> <tr> <td>U01AG074950</td> <td>PI Sharon Rosenzweig-Lipson</td> </tr> </table> | P01AG009973              | PI Michela Gallagher | R01AG061091 (inactive) | Multi-PI Michela Gallagher & Marilyn Albert | R01AG078769 | PI Richard Mohs (R01AG061091 site is one of the trial sites) | U01AG074950 | PI Sharon Rosenzweig-Lipson |
| P01AG009973                                        | PI Michela Gallagher                                                                                                                                                           |                                                                                                                                                                                                                                                                                                                                                                                                                                                                                                       |                          |                      |                        |                                             |             |                                                              |             |                             |
| R01AG061091 (inactive)                             | Multi-PI Michela Gallagher & Marilyn Albert                                                                                                                                    |                                                                                                                                                                                                                                                                                                                                                                                                                                                                                                       |                          |                      |                        |                                             |             |                                                              |             |                             |
| R01AG078769                                        | PI Richard Mohs (R01AG061091 site is one of the trial sites)                                                                                                                   |                                                                                                                                                                                                                                                                                                                                                                                                                                                                                                       |                          |                      |                        |                                             |             |                                                              |             |                             |
| U01AG074950                                        | PI Sharon Rosenzweig-Lipson                                                                                                                                                    |                                                                                                                                                                                                                                                                                                                                                                                                                                                                                                       |                          |                      |                        |                                             |             |                                                              |             |                             |
| <b>3</b>                                           | Royalties or licenses                                                                                                                                                          | <input type="checkbox"/> <b>None</b><br><table border="1" style="width: 100%; border-collapse: collapse; margin-top: 5px;"> <tr> <td style="width: 60%;">US Patent Office</td> <td>Institution (JHU)</td> </tr> <tr> <td> </td> <td> </td> </tr> <tr> <td> </td> <td> </td> </tr> </table>                                                                                                                                                                                                            | US Patent Office         | Institution (JHU)    |                        |                                             |             |                                                              |             |                             |
| US Patent Office                                   | Institution (JHU)                                                                                                                                                              |                                                                                                                                                                                                                                                                                                                                                                                                                                                                                                       |                          |                      |                        |                                             |             |                                                              |             |                             |
|                                                    |                                                                                                                                                                                |                                                                                                                                                                                                                                                                                                                                                                                                                                                                                                       |                          |                      |                        |                                             |             |                                                              |             |                             |
|                                                    |                                                                                                                                                                                |                                                                                                                                                                                                                                                                                                                                                                                                                                                                                                       |                          |                      |                        |                                             |             |                                                              |             |                             |

|    |                                                                                                              | Name all entities with whom you have this relationship or indicate none (add rows as needed) | Specifications/Comments (e.g., if payments were made to you or to your institution) |
|----|--------------------------------------------------------------------------------------------------------------|----------------------------------------------------------------------------------------------|-------------------------------------------------------------------------------------|
| 4  | Consulting fees                                                                                              | <input type="checkbox"/> None                                                                |                                                                                     |
|    |                                                                                                              | AgeneBio, Inc.                                                                               | self                                                                                |
|    |                                                                                                              |                                                                                              |                                                                                     |
|    |                                                                                                              |                                                                                              |                                                                                     |
| 5  | Payment or honoraria for lectures, presentations, speakers bureaus, manuscript writing or educational events | <input checked="" type="checkbox"/> None                                                     |                                                                                     |
|    |                                                                                                              |                                                                                              |                                                                                     |
|    |                                                                                                              |                                                                                              |                                                                                     |
|    |                                                                                                              |                                                                                              |                                                                                     |
| 6  | Payment for expert testimony                                                                                 | <input checked="" type="checkbox"/> None                                                     |                                                                                     |
|    |                                                                                                              |                                                                                              |                                                                                     |
|    |                                                                                                              |                                                                                              |                                                                                     |
|    |                                                                                                              |                                                                                              |                                                                                     |
| 7  | Support for attending meetings and/or travel                                                                 | <input checked="" type="checkbox"/> None                                                     |                                                                                     |
|    |                                                                                                              |                                                                                              |                                                                                     |
|    |                                                                                                              |                                                                                              |                                                                                     |
|    |                                                                                                              |                                                                                              |                                                                                     |
| 8  | Patents planned, issued or pending                                                                           | <input type="checkbox"/> None                                                                |                                                                                     |
|    |                                                                                                              | See attached doc                                                                             | Institutions                                                                        |
|    |                                                                                                              |                                                                                              |                                                                                     |
|    |                                                                                                              |                                                                                              |                                                                                     |
| 9  | Participation on a Data Safety Monitoring Board or Advisory Board                                            | <input checked="" type="checkbox"/> None                                                     |                                                                                     |
|    |                                                                                                              |                                                                                              |                                                                                     |
|    |                                                                                                              |                                                                                              |                                                                                     |
|    |                                                                                                              |                                                                                              |                                                                                     |
| 10 | Leadership or fiduciary role in other board, society, committee, or advocacy group, paid or unpaid           | <input checked="" type="checkbox"/> None                                                     |                                                                                     |
|    |                                                                                                              |                                                                                              |                                                                                     |
|    |                                                                                                              |                                                                                              |                                                                                     |
|    |                                                                                                              |                                                                                              |                                                                                     |

|    |                                                                                   | Name all entities with whom you have this relationship or indicate none (add rows as needed) | Specifications/Comments (e.g., if payments were made to you or to your institution) |
|----|-----------------------------------------------------------------------------------|----------------------------------------------------------------------------------------------|-------------------------------------------------------------------------------------|
| 11 | Stock or stock options                                                            | <input type="checkbox"/> None                                                                |                                                                                     |
|    |                                                                                   | AgeneBio, Inc.                                                                               | Self                                                                                |
|    |                                                                                   |                                                                                              |                                                                                     |
|    |                                                                                   |                                                                                              |                                                                                     |
| 12 | Receipt of equipment, materials, drugs, medical writing, gifts, or other services | <input checked="" type="checkbox"/> None                                                     |                                                                                     |
|    |                                                                                   |                                                                                              |                                                                                     |
|    |                                                                                   |                                                                                              |                                                                                     |
|    |                                                                                   |                                                                                              |                                                                                     |
| 13 | Other financial or non-financial interests                                        | <input checked="" type="checkbox"/> None                                                     |                                                                                     |
|    |                                                                                   |                                                                                              |                                                                                     |
|    |                                                                                   |                                                                                              |                                                                                     |
|    |                                                                                   |                                                                                              |                                                                                     |

Please place an "X" next to the following statement to indicate your agreement:

I certify that I have answered every question and have not altered the wording of any of the questions on this form.

| <b>id</b>          | <b>title</b>                                                     | <b>assignee</b>                                             |
|--------------------|------------------------------------------------------------------|-------------------------------------------------------------|
| US-2021244709-A1   | Methods and compositions for improving cognitive function        | The Johns Hopkins University                                |
| US-10624875-B2     | Methods and compositions for treating schizophrenia              | The Johns Hopkins University                                |
| US-2022218665-A1   | Methods and compositions for improving cognitive function        | The Johns Hopkins University                                |
| US-2022265685-A1   | Methods and compositions for improving cognitive function        | The Johns Hopkins University                                |
| AU-2021200325-B2   | Methods and compositions for improving cognitive function        | The Johns Hopkins University                                |
| US-2008177061-A1   | Target for therapy of cognitive impairment                       | Michela Gallagher, Pauline Kay Lund, Rothstein Jeffrey D    |
| WO-2007019312-A3   | Methods for characterizing and treating cognitive impairment in  | Univ Johns Hopkins, Michela Gallagher, Rebecca Haberman     |
| BR-112017025031-B1 | LEVETIRACETAM EXTENDED RELEASE PHARMACEUTICAL COMPOSITIONS       | Agenebio, Inc                                               |
| US-2014057903-A1   | Methods for characterizing and treating cognitive impairment in  | The Johns Hopkins University                                |
| WO-2014144546-A1   | Methods and compositions for improving cognitive function        | The Johns Hopkins University                                |
| WO-2014078377-A1   | Methods and compositions for treating schizophrenia              | Agenebio, Inc.                                              |
| WO-2010105189-A1   | Method for identifying compounds that attenuate the function     | The Johns Hopkins University                                |
| WO-2009139901-A2   | Methods and compositions for improving cognitive function        | The Johns Hopkins University                                |
| US-2005267076-A1   | Method for improving cognitive function                          | Johns Hopkins University                                    |
| WO-2006034485-A2   | Treatment for age-related cognitive decline and other condition  | The Johns Hopkins University, University Of North Carolina  |
| US-2006014801-A1   | Prevention and treatment of cognitive impairment using (R)-(-)-2 | The Johns Hopkins University                                |
| EP-3590506-A1      | Extended release pharmaceutical compositions of levetiracetam    | Agenebio, Inc.                                              |
| AU-2018208662-A1   | Methods and Compositions for Treating Schizophrenia              | The Johns Hopkins University                                |
| OA-18467-A         | Extended release pharmaceutical compositions of levetiracetam    | Agenebio, Inc                                               |
| WO-2014153180-A1   | Methods and compositions for improving cognitive function        | Michela Gallagher                                           |
| AU-2013344646-A1   | Methods and compositions for treating schizophrenia              | The Johns Hopkins University                                |
| CA-3189302-A1      | Combinations of gabaa alpha 5 agonists and sv2a inhibitors and   | Agenebio, Inc., Michela Gallagher, Sharon Rosenzweig-Lipson |
